# Supplementary material for: Fe-Triazole coordination compound-derived Fe2O3 nanoparticles anchored on Fe-MOF/N-doped carbon nanosheets for efficient electrocatalytic oxygen evolution reaction
Source: Royal Society of Chemistry journal article supplement (doi:10.1039/d1dt03437e), 2021-01-01
Supplement: d1dt03437e1.pdf [file d1dt03437e1.pdf]

## Supporting Information

### Fe-triazole coordination compound-derived Fe<sub>2</sub>O<sub>3</sub> nanoparticles anchored on Fe-MOF/N-doped carbon nanosheets for efficient electrocatalytic oxygen evolution reaction

Xing Liu and Yun Gong\*

*Department of Applied Chemistry, College of Chemistry and Chemical Engineering, Chongqing University, Chongqing 401331, P. R. China. E-mail: gongyun7211@cqu.edu.cn; Tel: +86 023 65678932*

(a)

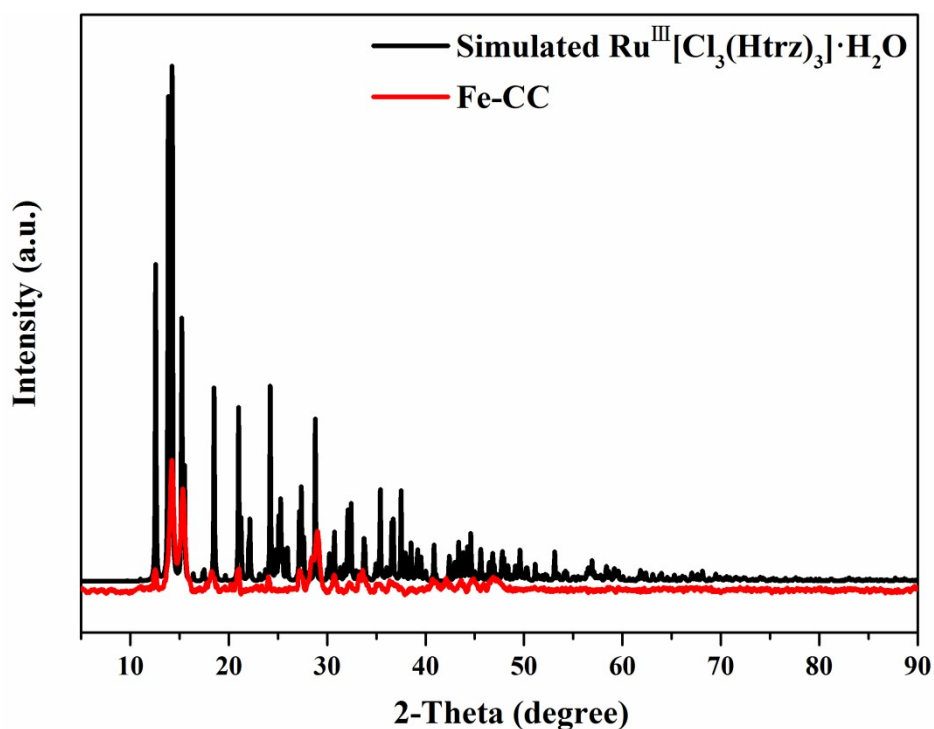

(b)

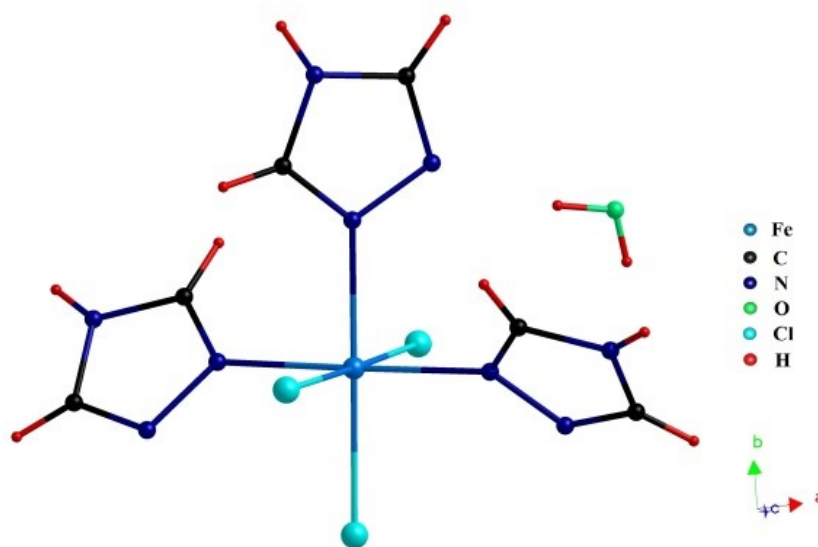

(c)

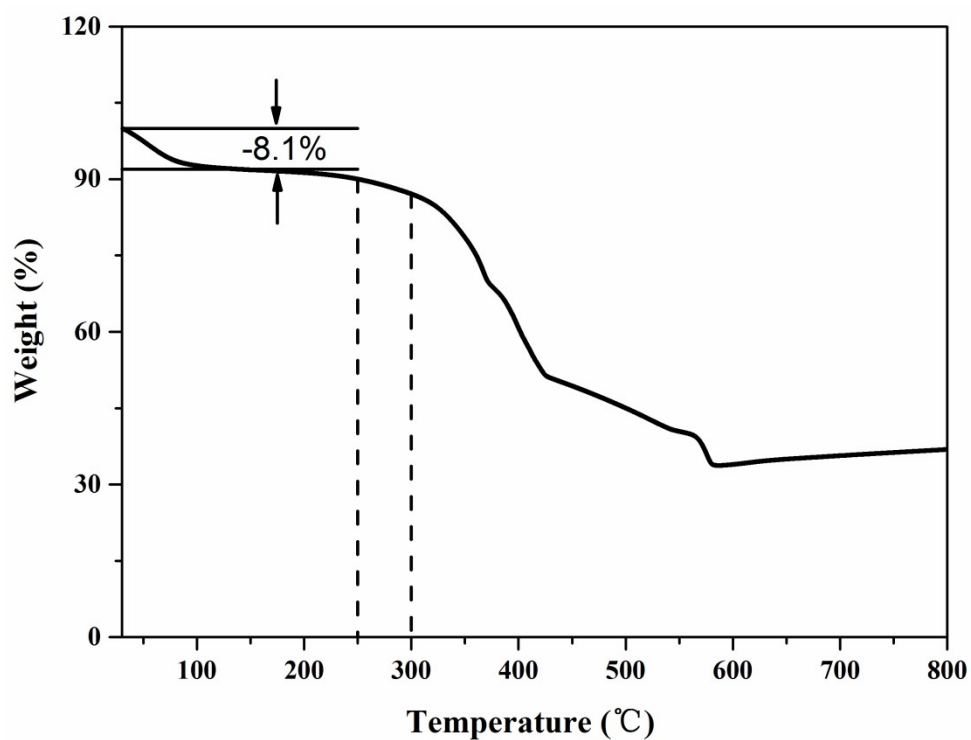

**Fig. S1** (a) XRD pattern of Fe-CC and the simulated profile of  $[\text{Ru}^{\text{III}}\text{Cl}_3(\text{Htrz})_3]\cdot\text{H}_2\text{O}$ ; (b) The structure of  $[\text{Fe}^{\text{III}}\text{Cl}_3(\text{Htrz})_3]\cdot\text{H}_2\text{O}$ ; (c) TG curve of Fe-CC; (d) XRD of  $\text{Fe}_2\text{O}_3/\text{NC}/\text{Fe-MOF}$ ,  $\text{Fe}_2\text{O}_3/\text{NC}$ , the standard profile of  $\text{Fe}_2\text{O}_3$  and the simulated one of  $[\text{Fe}^{\text{II}}\text{Cl}_2(\text{Htrz})]$ .

## Syntheses of Fe<sub>2</sub>O<sub>3</sub>/NC/Fe-MOF and Fe<sub>2</sub>O<sub>3</sub>/NC

The synthesis condition of Fe<sub>2</sub>O<sub>3</sub>/NC/Fe-MOF was similar to that of S-doped Fe<sub>2</sub>O<sub>3</sub>/NC/Fe-MOF except in the absence of S powder (250°C, 1 h). And the synthesis condition of Fe<sub>2</sub>O<sub>3</sub>/NC was similar to that of FeS<sub>2</sub>/NC except in the absence of S powder (400°C, 1 h). Their XRD patterns are seen in shown in **Fig. S1d**. As shown in **Fig. S2a**, when annealing at 250°C in the absence of S, the XRD pattern of the obtained sample meets well with those of Fe-MOF and Fe<sub>2</sub>O<sub>3</sub>, while at the annealing temperature of 400 °C without S, the XRD pattern of the calcined sample perfectly coincides with the standard profile of Fe<sub>2</sub>O<sub>3</sub>.

As shown in **Fig. S2(b-d)** and **Fig. S2 (n-p)**, Both Fe<sub>2</sub>O<sub>3</sub>/NC/Fe-MOF and Fe<sub>2</sub>O<sub>3</sub>/NC are nanoparticles. It is obvious that Fe<sub>2</sub>O<sub>3</sub>/NC/Fe-MOF appears to be agglomerated, while Fe<sub>2</sub>O<sub>3</sub>/NC is in a more uniform state with higher crystallinity.)

(a)

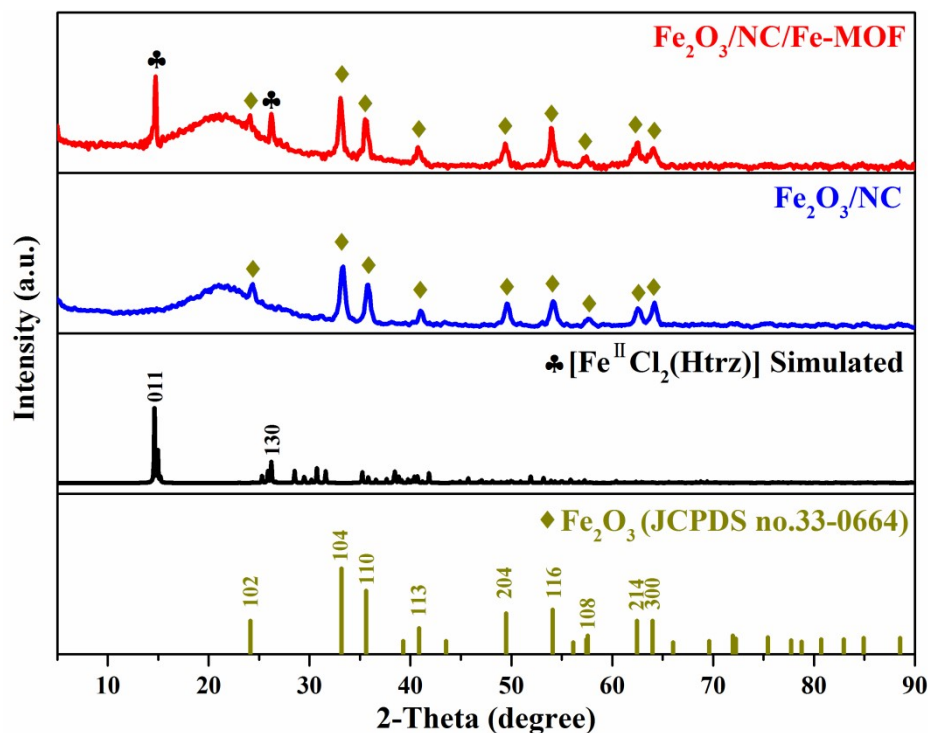

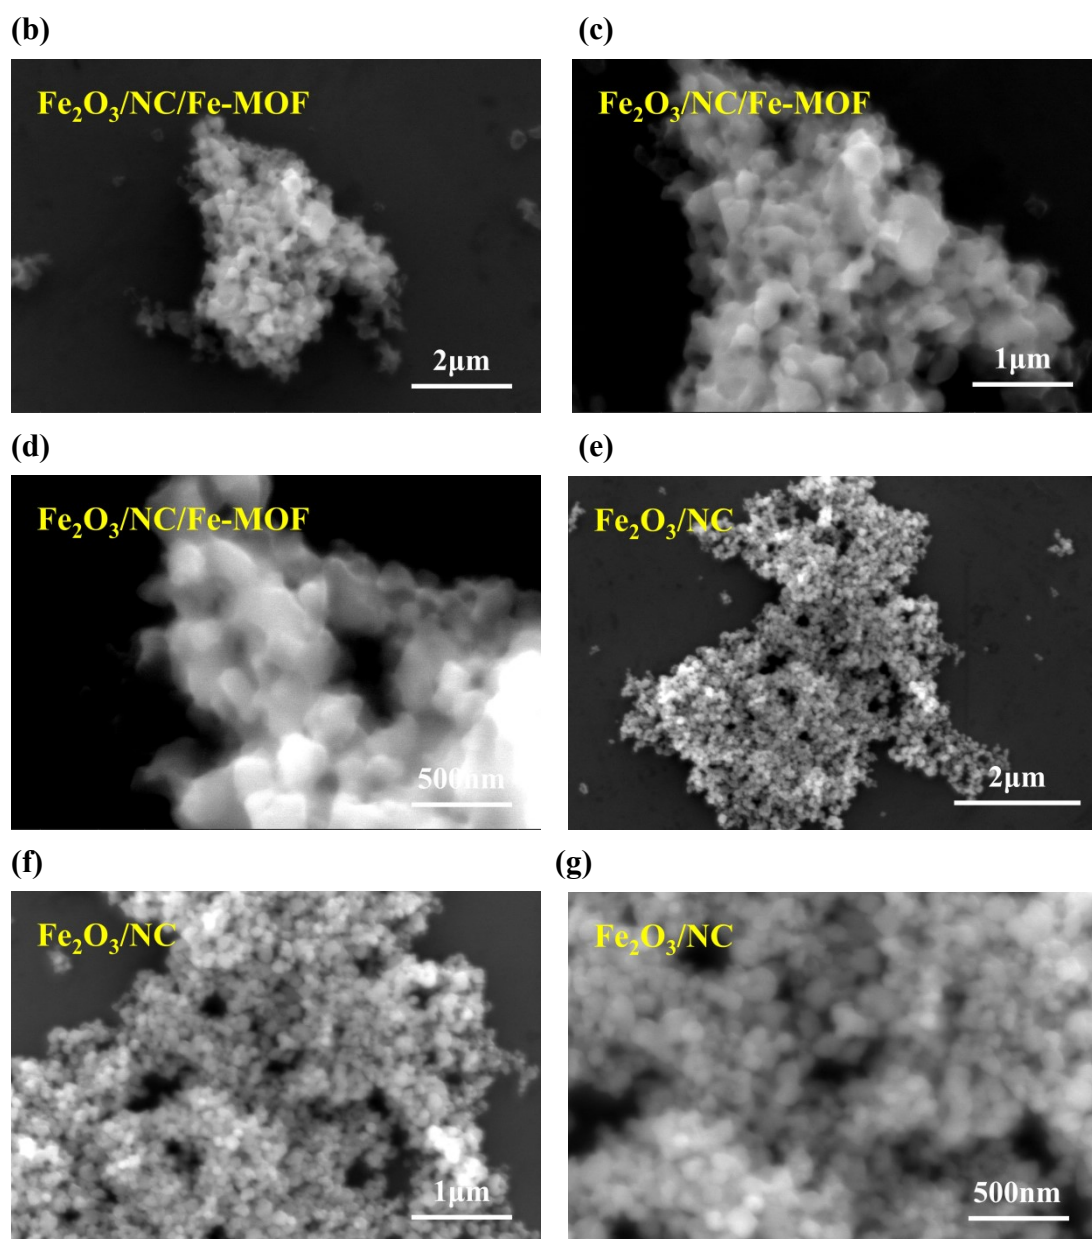

**Fig. S2** (a) XRD patterns of Fe<sub>2</sub>O<sub>3</sub>/NC/Fe-MOF, Fe<sub>2</sub>O<sub>3</sub>/NC, the standard profile of Fe<sub>2</sub>O<sub>3</sub> and the simulated one of [Fe<sup>II</sup>Cl<sub>2</sub>(Htrz)]; SEM images of (b-d) Fe<sub>2</sub>O<sub>3</sub>/NC/Fe-MOF and (e-g) Fe<sub>2</sub>O<sub>3</sub>/NC.

(a)

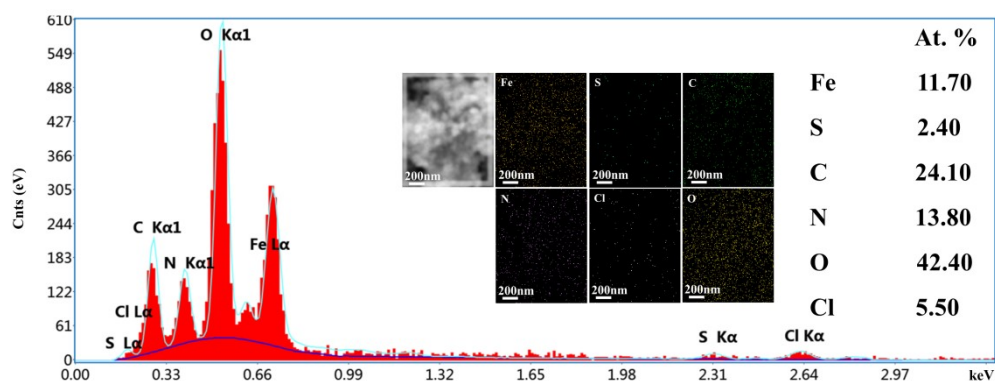

(b)

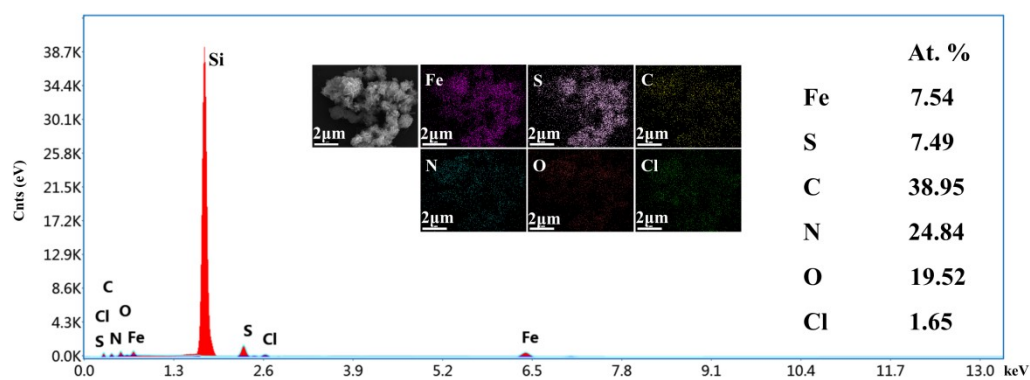

(c)

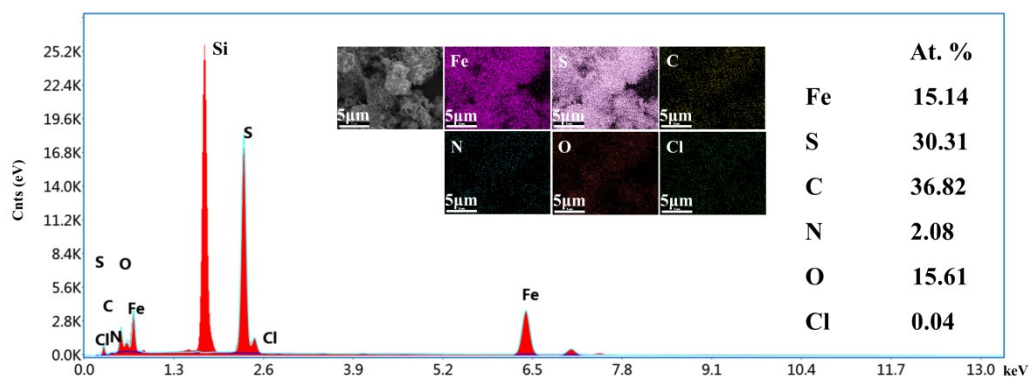

**Fig. S3** EDS and elemental mappings for (a) S-doped Fe<sub>2</sub>O<sub>3</sub>/NC/Fe-MOF, (b) FeS<sub>2</sub>/NC/Fe-MOF and (c) FeS<sub>2</sub>/NC.

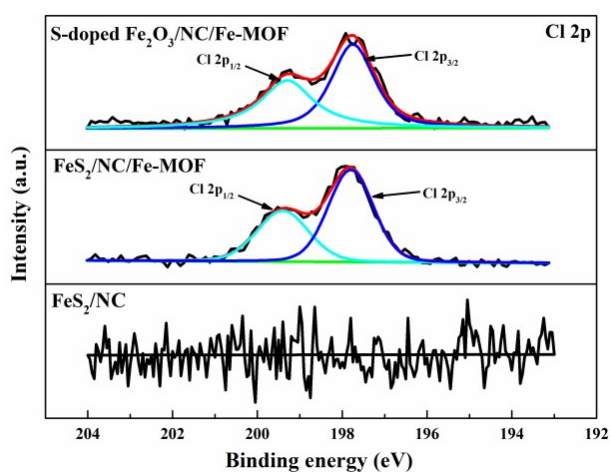

**Fig. S4** High-resolution XPS spectra of Cl 2p for the S-doped  $\text{Fe}_2\text{O}_3/\text{NC}/\text{Fe-MOF}$ ,  $\text{FeS}_2/\text{NC}/\text{Fe-MOF}$  and  $\text{FeS}_2/\text{NC}$ .

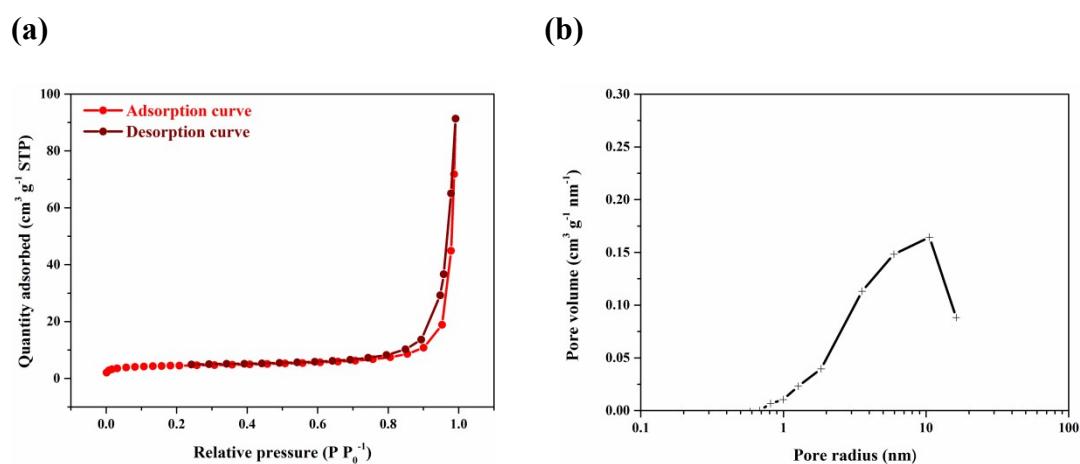

**Fig. S5** Nitrogen adsorption/desorption curve and pore size distribution of the S-doped  $\text{Fe}_2\text{O}_3/\text{NC}/\text{Fe-MOF}$ .

**Table S1** Performance comparison of different iron-based catalysts for oxygen evolution reaction.

| Catalysts | Overpotential<br>(mV) @ current<br>density ( $\text{mA cm}^{-2}$ ) | Tafel slope<br>( $\text{mV dec}^{-1}$ ) | Electrolyte | Reference |
|-----------|--------------------------------------------------------------------|-----------------------------------------|-------------|-----------|
|-----------|--------------------------------------------------------------------|-----------------------------------------|-------------|-----------|

| <b>This work</b>                                                         | <b>185@10</b> | <b>88.4</b> | <b>1 M KOH</b> |    |
|--------------------------------------------------------------------------|---------------|-------------|----------------|----|
| <b>Fe<sub>2</sub>O<sub>3</sub> NPs@NiO NSs/GCE</b>                       | 221@10        | 53.4        | 4 M KOH        | 1  |
| <b>EA-Cu@Fe@Ni/CP</b>                                                    | 240@10        | 47          | 1 M KOH        | 2  |
| <b>Co<sub>3</sub>O<sub>4</sub>/Fe<sub>2</sub>O<sub>3</sub>/GCE</b>       | 310@10        | 67          | 1 M KOH        | 3  |
| <b>Fe<sub>2</sub>O<sub>3</sub>/CNT/GCE</b>                               | 410@10        | 61          | 1 M KOH        | 4  |
| <b>P- Fe<sub>2</sub>O<sub>3</sub> -0.45/CP</b>                           | 270@10        | 72.1        | 1 M KOH        | 5  |
| <b>NF/NiSe@Fe<sub>2</sub>O<sub>3</sub>/NF</b>                            | 220 @10       | 36.9        | 1 M KOH        | 6  |
| <b>α-Fe<sub>2</sub>O<sub>3</sub>/NF</b>                                  | 275@10        | 73.63       | 1 M KOH        | 7  |
| <b>Ni<sub>2</sub>S<sub>3</sub>/Fe<sub>2</sub>O<sub>3</sub>/NC/NF-600</b> | 220@100       | 64.3        | 1 M KOH        | 8  |
| <b>MnFeO-NF-0.4/NF</b>                                                   | 157@10        | 46          | 1 M KOH        | 9  |
| <b>Ni-Fe<sub>2</sub>O<sub>3</sub>/GCE</b>                                | 227@10        | 68          | 1 M KOH        | 10 |
| <b>Fe<sub>2</sub>O<sub>3</sub>@CuO NTs/CF</b>                            | 398@100       | 41.07       | 1 M KOH        | 11 |
| <b>SS-Fe-0.5/GCE</b>                                                     | 440@10        | 68          | 1 M KOH        | 12 |
| <b>NiCo/Fe<sub>3</sub>O<sub>4</sub>/MOF-74/GCE</b>                       | 238@10        | 29          | 1 M KOH        | 13 |
| <b>Fe<sub>2</sub>O<sub>3</sub>/CoO<sub>x</sub>/CC</b>                    | 315@10        | 56          | 1 M KOH        | 14 |
| <b>CoS<sub>2</sub>-FeS<sub>2</sub>/NF</b>                                | 210@10        | 46          | 1 M KOH        | 15 |
| <b>Fe<sub>3</sub>O<sub>4</sub>/FeS<sub>2</sub>-2.5/NF</b>                | 253@10        | 48          | 1 M KOH        | 16 |
| <b>Fe(ox)(H<sub>2</sub>O)<sub>2</sub>/NF-(-1.4)-15</b>                   | 270@40        | 135         | 1 M KOH        | 17 |
| <b>Fe<sub>3</sub>N-CN/NF</b>                                             | 218@10        | 84          | 1 M KOH        | 18 |
| <b>Ni<sub>0.7</sub>Fe<sub>0.3</sub>S<sub>2</sub>/NF</b>                  | 198@10        | 56          | 1 M KOH        | 19 |
| <b>NiFe(Co<sub>3</sub>)<sub>2</sub>--LDH/NF</b>                          | 228@10        | 37          | 1 M KOH        | 20 |

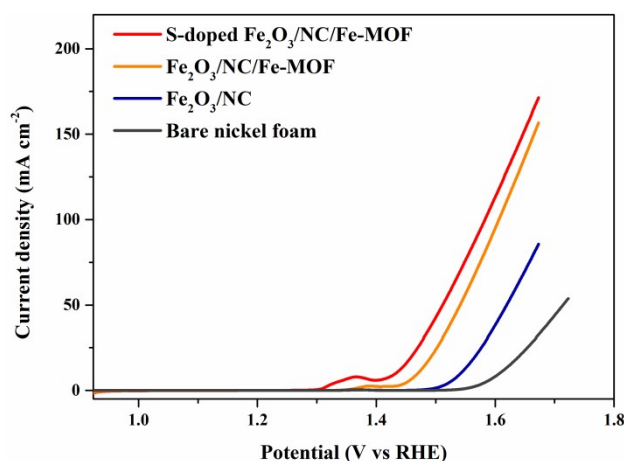

**Fig. S6** LSV curves of bare nickel foam, Fe<sub>2</sub>O<sub>3</sub>/NC/Fe-MOF, Fe<sub>2</sub>O<sub>3</sub>/NC and S-doped Fe<sub>2</sub>O<sub>3</sub>/NC/Fe-MOF.

The LSV curves of Fe<sub>2</sub>O<sub>3</sub>/NC/Fe-MOF and Fe<sub>2</sub>O<sub>3</sub>/NC at 2 mV s<sup>-1</sup> are shown in **Fig. S6**. To achieve 10 mA cm<sup>-2</sup> of OER current density, the overpotentials ( $\eta_{10}$ ) at Fe<sub>2</sub>O<sub>3</sub>/NC/Fe-MOF and Fe<sub>2</sub>O<sub>3</sub>/NC are 240 and 312 mV, respectively, which are much larger than that of S-doped Fe<sub>2</sub>O<sub>3</sub>/NC/Fe-MOF (185 mV). And the OER activity follows the trend: S-doped Fe<sub>2</sub>O<sub>3</sub>/NC/Fe-MOF > Fe<sub>2</sub>O<sub>3</sub>/NC/Fe-MOF > Fe<sub>2</sub>O<sub>3</sub>/NC, indicating the synergistic effect of the components in the S-doped Fe<sub>2</sub>O<sub>3</sub>/NC/Fe-MOF heterostructure.

**Table S2** The parameters in simulated equivalent circuits for the samples

| Sample                                            | R <sub>s</sub><br>( $\Omega$ cm <sup>-2</sup> ) | R <sub>ct</sub><br>( $\Omega$ cm <sup>-2</sup> ) | CPE1   | R <sub>mt</sub><br>( $\Omega$ cm <sup>-2</sup> ) | CPE2   |
|---------------------------------------------------|-------------------------------------------------|--------------------------------------------------|--------|--------------------------------------------------|--------|
| S-doped Fe <sub>2</sub> O <sub>3</sub> /NC/Fe-MOF | 1.057                                           | 0.1812                                           | 0.4051 | 0.1126                                           | 0.0094 |
| Fe-CC                                             | 1.092                                           | 0.2244                                           | 0.0065 | 0.1726                                           | 0.3399 |
| FeS <sub>2</sub> /NC/Fe-MOF                       | 1.646                                           | 0.2445                                           | 0.6274 | 0.1707                                           | 0.0119 |
| FeS <sub>2</sub> /NC                              | 1.242                                           | 0.2128                                           | 0.0102 | 0.1378                                           | 0.1093 |



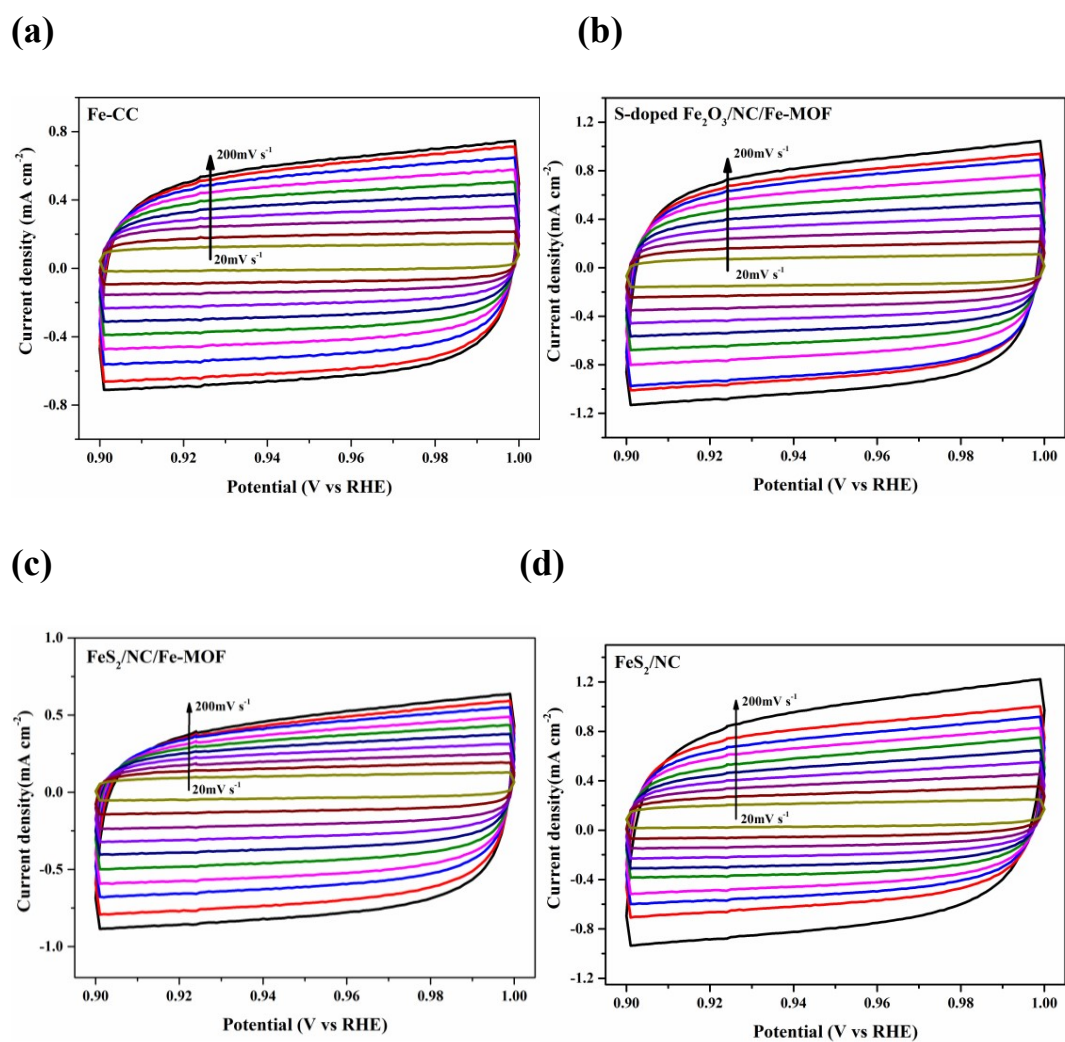

**Fig. S7** CV curves of (a) Fe-CC, (b) S-doped  $\text{Fe}_2\text{O}_3/\text{NC}/\text{Fe-MOF}$ , (c)  $\text{FeS}_2/\text{NC}/\text{Fe-MOF}$  and (d)  $\text{FeS}_2/\text{NC}$  measured in 1 M KOH solution at different scan rates of 20 to 200  $\text{mV s}^{-1}$ .

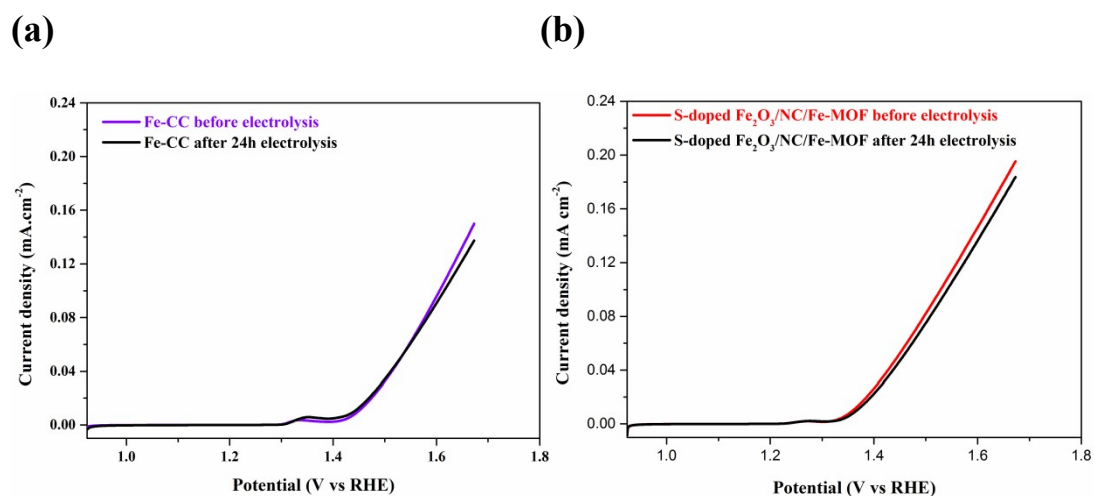

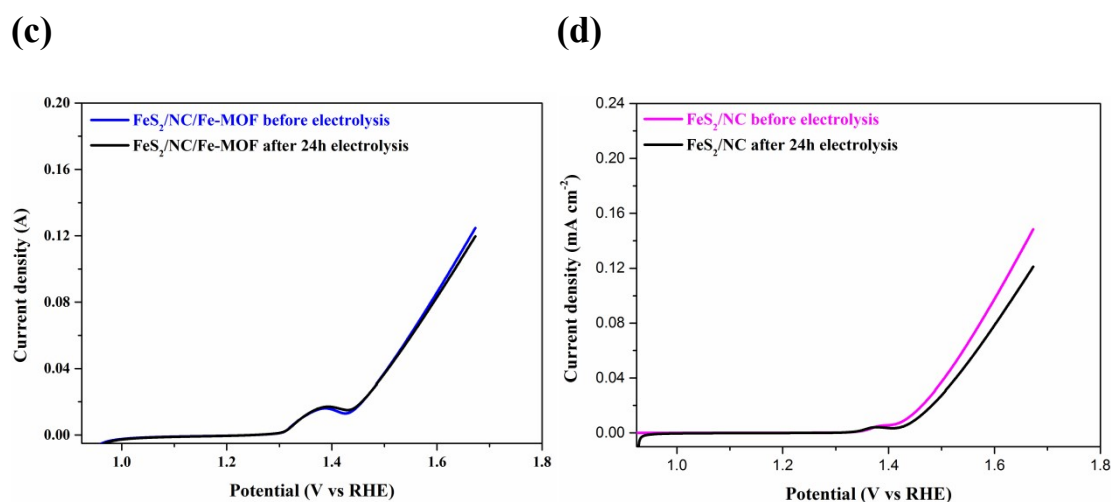

**Fig. S8** LSV curves of (a) Fe-CC, (b) S-doped Fe<sub>2</sub>O<sub>3</sub>/NC/Fe-MOF, (c) FeS<sub>2</sub>/NC/Fe-MOF and (d) FeS<sub>2</sub>/NC before and after 24 h-electrolysis at 2 mV s<sup>-1</sup>.

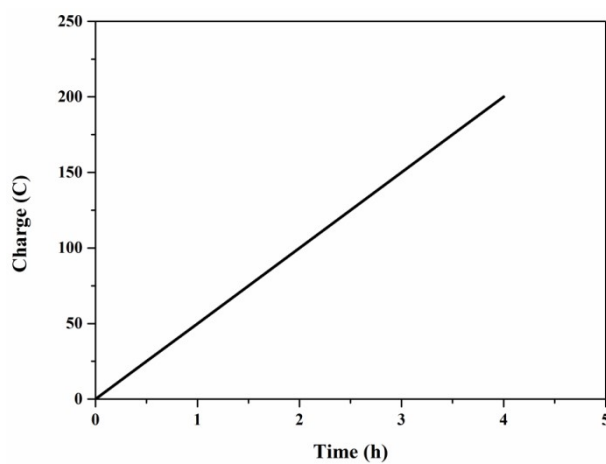

**Fig. S9** The plot of charge buildup versus time during 4h-electrolysis at a potential of 1.49 V vs RHE (overpotential  $\eta = 0.26$  V).

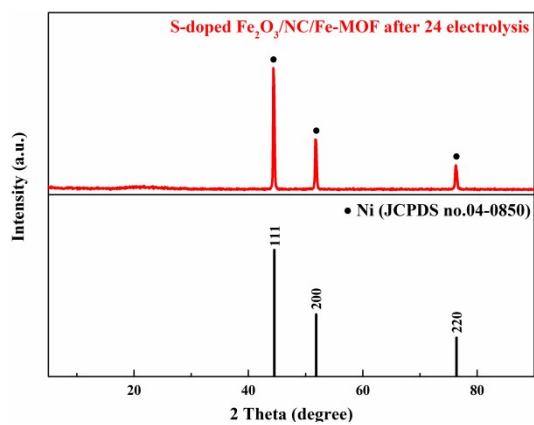

**Fig. S10** XRD pattern of S-doped Fe<sub>2</sub>O<sub>3</sub>/NC/Fe-MOF after 24h-electrolysis and the standard profile of Ni.

(a)

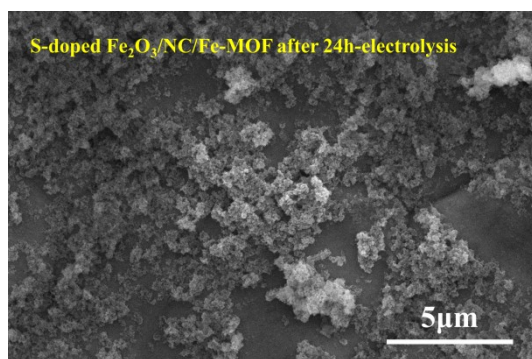

(b)

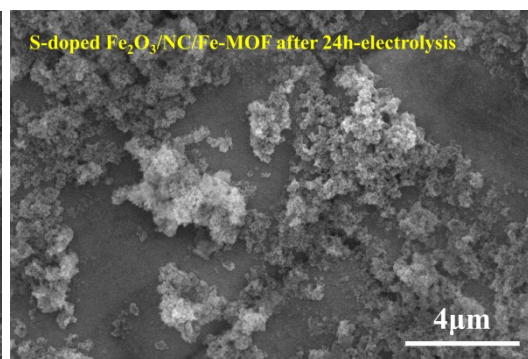

(c)

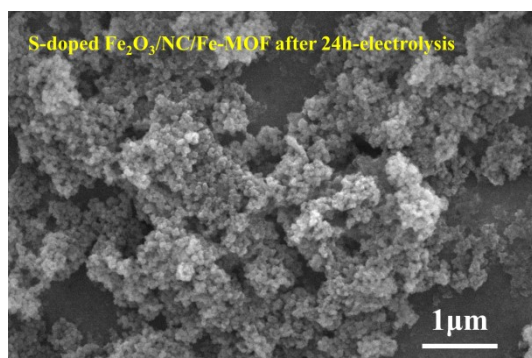

(d)

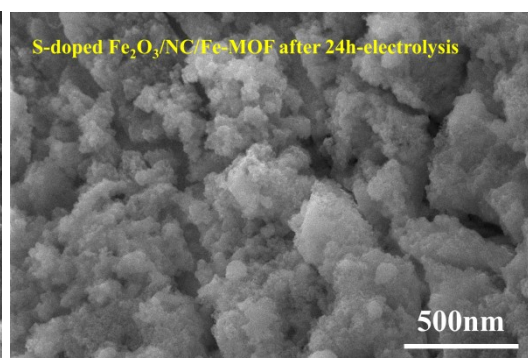

(e)

(f)

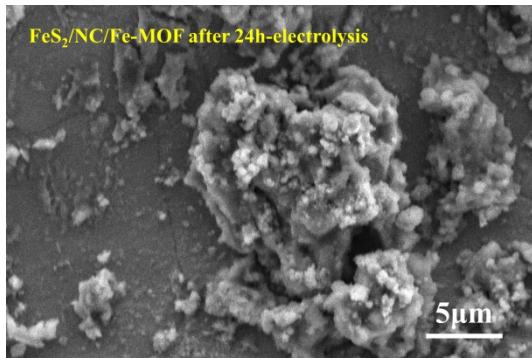

(g)

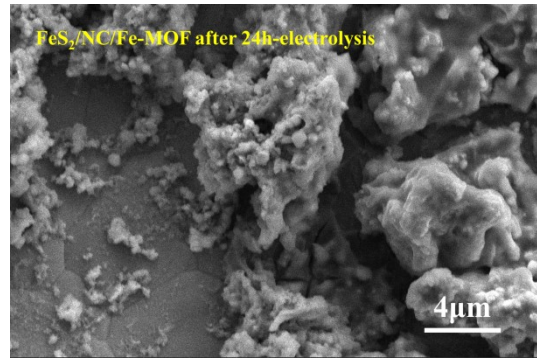

(h)

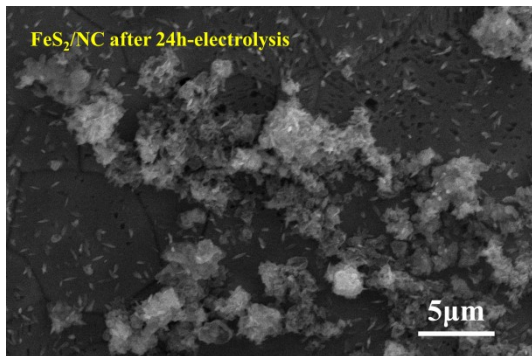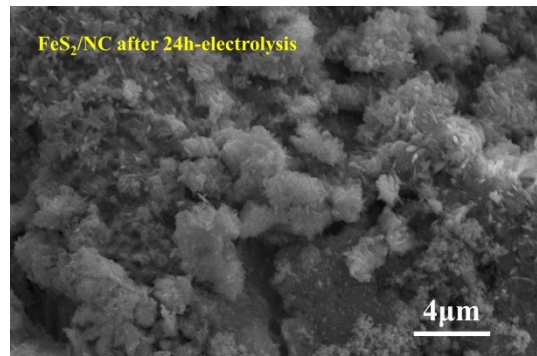

**Fig. S11** SEM images of (a-d) S-doped Fe<sub>2</sub>O<sub>3</sub>/NC/Fe-MOF, (e, f) FeS<sub>2</sub>/NC/Fe-MOF and (g, h) FeS<sub>2</sub>/NC after 24h-electrolysis.

(a)

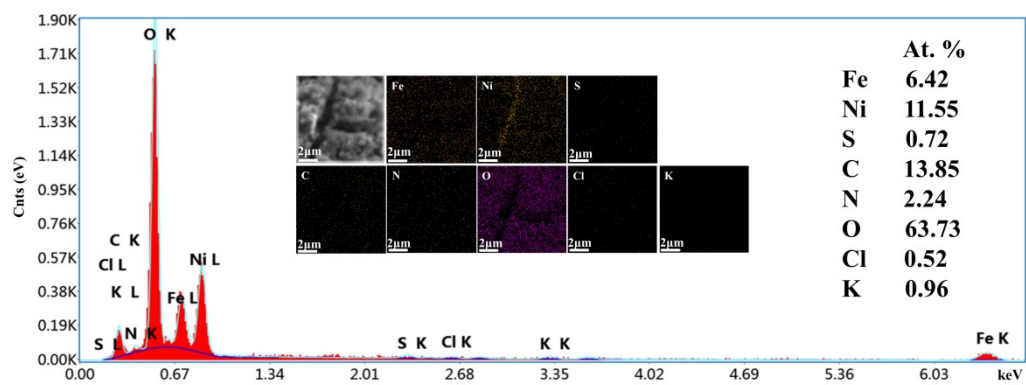

(b)

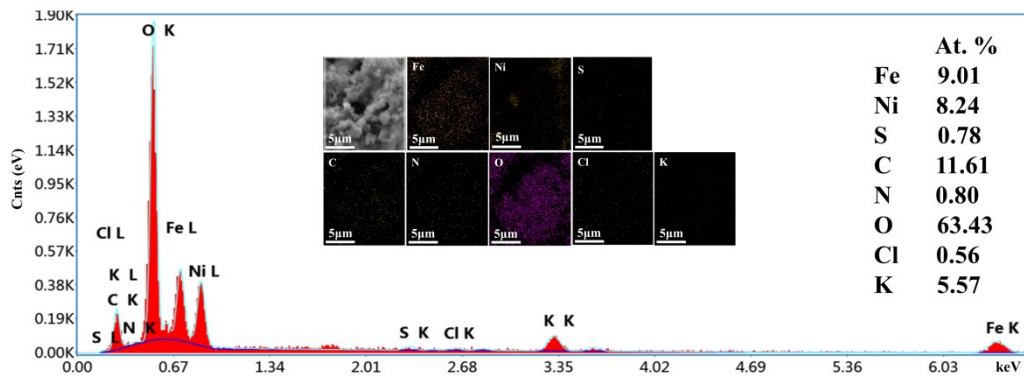

(c)

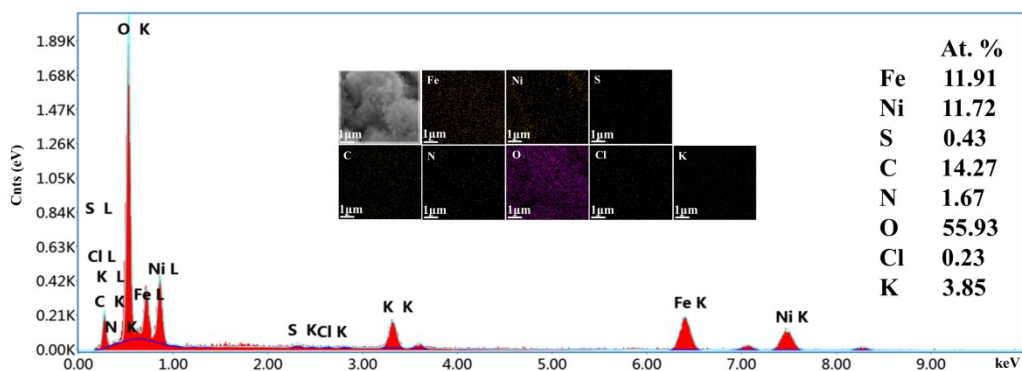

**Fig. S12** EDS and elemental mappings for (a) S-doped Fe<sub>2</sub>O<sub>3</sub>/NC/Fe-MOF, (b) FeS<sub>2</sub>/NC/Fe-MOF and (c) FeS<sub>2</sub>/NC after 24h-electrolysis.

**Table S3** The DFT calculation results for Fe<sub>2</sub>O<sub>3</sub> and FeS<sub>2</sub>

|                           | Fe-site for Fe <sub>2</sub> O <sub>3</sub> | Fe-site for FeS <sub>2</sub> |
|---------------------------|--------------------------------------------|------------------------------|
| $\Delta G_{M-OH^*}$ (eV)  | 0.841                                      | 0.859                        |
| $\Delta G_{M-O^*}$ (eV)   | 2.043                                      | 1.128                        |
| $\Delta G_{M-OOH^*}$ (eV) | 3.835                                      | 2.700                        |
| $\Delta G_1$ (eV)         | 1.674                                      | 1.692                        |
| $\Delta G_2$ (eV)         | 2.035                                      | 1.102                        |
| $\Delta G_3$ (eV)         | 2.625                                      | 2.405                        |
| $\Delta G_4$ (eV)         | 1.918                                      | 3.053                        |

(a)

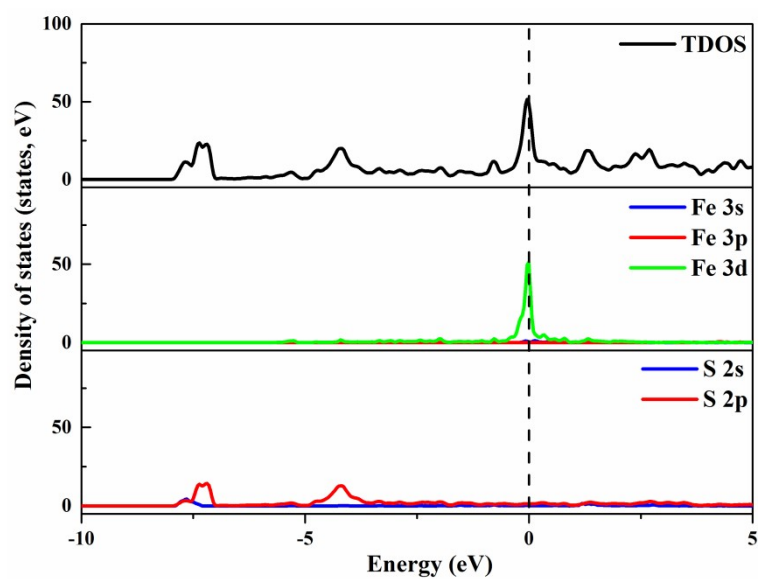

(b)

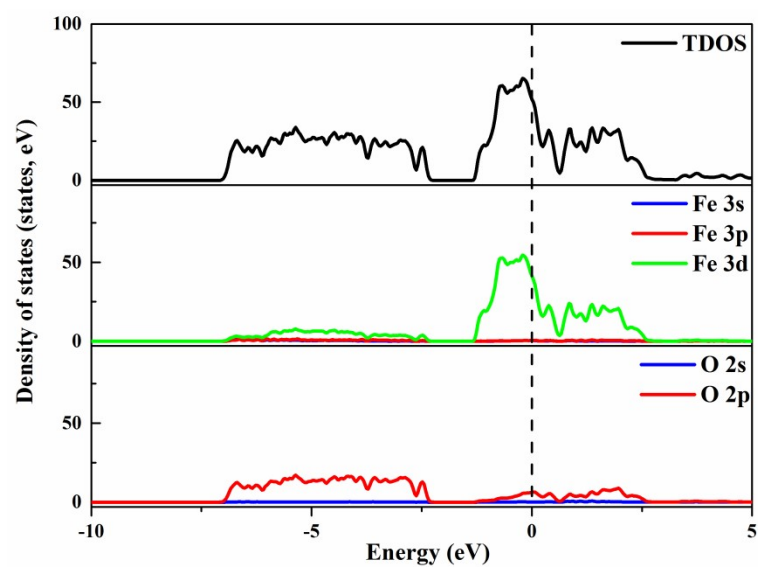

**Fig. S13** TDOS and PDOS for (a)  $\text{FeS}_2$  and (b)  $\text{Fe}_2\text{O}_3$ , in which s, p and d orbitals are denoted in blue, red and green, respectively. The position of the Fermi level is indicated by a black dotted vertical line at 0 eV.

## References:

1. F. Qiu, J. Shi, M. Guo, S. Chen, J. Xia and Z. H. Lu, *Inorg Chem*, 2021, **60**, 959-966.
2. B. Jiang, Z. Wan, Y. Kang, Y. Guo, J. Henzie, J. Na, H. Li, S. Wang, Y. Bando, Y. Sakka and Y. Yamauchi, *Nano Energy*, 2021, **81**, 105644.
3. X. J. Wei, Y. H. Li, H. R. Peng, D. Gao, Y. Q. Ou, Y. B. Yang, J. R. Hu, Y. H. Zhang and P. Xiao, *Chem Eng J*, 2019, **355**, 336-340.
4. H. A. Bandal, A. R. Jadhav, A. A. Chaugule, W. J. Chung and H. Kim, *Electrochim Acta*, 2016, **222**, 1316-1325.
5. Y. L. Tong, B. Q. Chi, D. L. Qi and W. Q. Zhang, *Rsc Adv*, 2021, **11**, 1233-1240.
6. K. L. Guo, Y. T. Wang, S. Z. Yang, J. F. Huang, Z. H. Zou, H. R. Pan, P. S. Shinde, S. L. Pan, J. E. Huang and C. L. Xu, *Sci Bull*, 2021, **66**, 52-61.
7. Q. Q. Xu, W. Huo, S. S. Li, J. H. Fang, L. Li, B. Y. Zhang, F. Zhang, Y. X. Zhang and S. W. Li, *Appl Surf Sci*, 2020, **533**.
8. S. A. Shah, X. P. Shen, A. H. Yuan, Z. Y. Ji, X. Y. Yue, G. X. Zhu, H. B. Zhou, K. Q. Xu, J. Zhu and Y. Chen, *Appl Surf Sci*, 2020, **527**.
9. J. Luo, W. H. Guo, Q. Zhang, X. H. Wang, L. Shen, H. C. Fu, L. L. Wu, X. H. Chen, H. Q. Luo and N. B. Li, *Nanoscale*, 2020, **12**, 19992-20001.
10. A. Samanta, S. Das and S. Jana, *Acs Sustain Chem Eng*, 2019, **7**, 12117-12124.
11. Y. Gao, N. Zhang, C. R. Wang, F. Zhao and Y. Yu, *Acs Appl Energ Mater*, 2020, **3**, 666-674.
12. C. Q. Li, T. Zhao, S. Y. H. Abdalkarim, Y. H. Wu, M. T. Lu, Y. W. Li, J. K. Gao and J. M. Yao, *Z Anorg Allg Chem*, 2018, **644**, 1103-1107.
13. X. L. Wang, H. Xiao, A. Li, Z. Li, S. J. Liu, Q. H. Zhang, Y. Gong, L. R. Zheng, Y. Q. Zhu, C. Chen, D. S. Wang, Q. Peng, L. Gu, X. D. Han, J. Li and Y. D. Li, *J Am Chem Soc*, 2018, **140**, 15336-15341.
14. S. S. Zhu, L. A. Huang, Z. S. He, K. Wang, J. F. Guo, S. E. Pei, H. B. Shao and J. M. Wang, *J Electroanal Chem*, 2018, **827**, 42-50.
15. W. P. Wang, Y. Xu, J. L. Yao, X. E. Liu, Z. M. Yin and Z. C. Li, *Dalton T*, 2020, **49**, 13352-13358.
16. M. J. Wang, X. Q. Zheng, L. L. Song, X. Feng, Q. Liao, J. Li, L. Li and Z. D. Wei, *J Mater Chem A*, 2020, **8**, 14145-14151.
17. Y. Hai, L. Liu and Y. Gong, *Inorg Chem*, 2021, **60**, 5140-5152.
18. W. Wang, L. Liu, W. C. Leng, L. L. Cui and Y. Gong, *Inorg Chem*, 2021, **60**, 12136-12150.
19. J. H. Yu, G. Z. Cheng and W. Luo, *J Mater Chem A*, 2017, **5**, 15838-15844.
20. S. Liang, B. Wei, M. K. Yuan, Y. Li, X. Ma, Y. Y. Wu and L. L. Xu, *Chemistryselect*, 2020, **5**, 3062-3068.
